# Supplementary figures and images for: Curcumin micelles suppress gastric tumor cell growth by upregulating ROS generation, disrupting redox equilibrium and affecting mitochondrial bioenergetics
Source: Royal Society of Chemistry journal article supplement (doi:10.1039/d0fo00260g), 2020-01-01

## Supplementary information

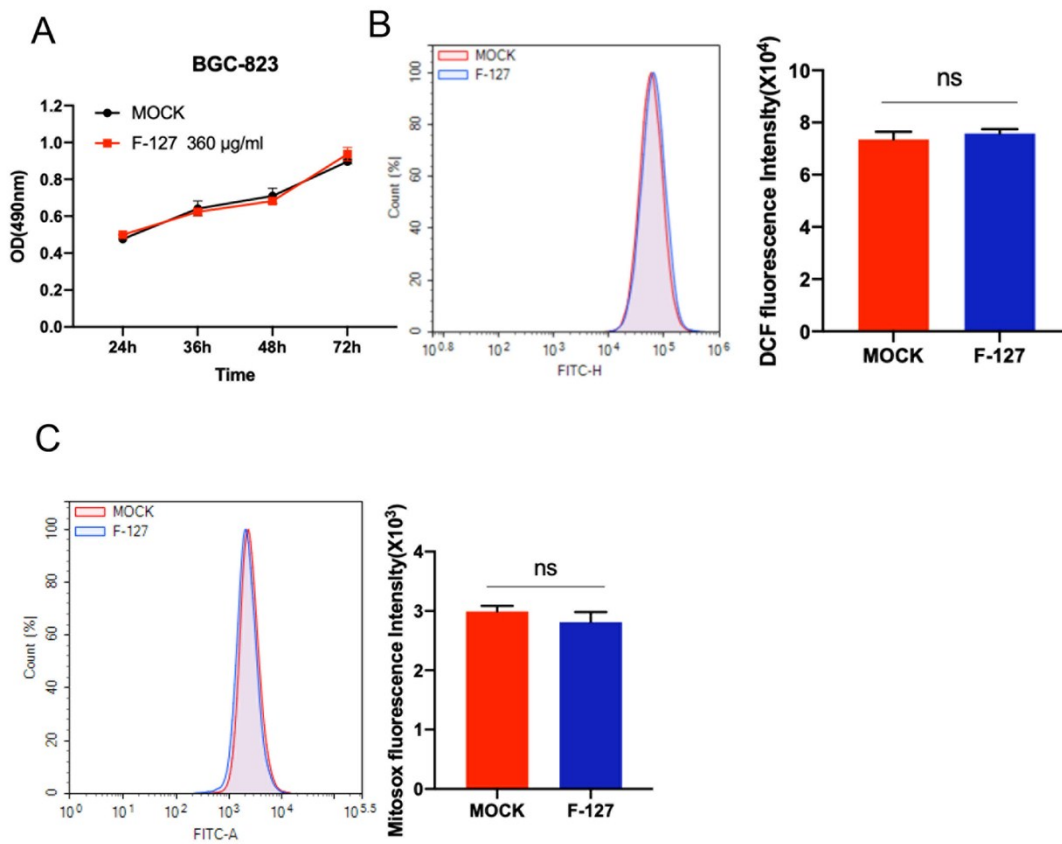

Supplement: d0fo00260g1.pdf [file d0fo00260g1.pdf]
